# The Japanese Guidelines for Gastric Cancer Screening

Chisato Hamashima<sup>1</sup>, Daisuke Shibuya<sup>2</sup>, Hideo Yamazaki<sup>3</sup>, Kazuhiko Inoue<sup>4</sup>, Akira Fukao<sup>5</sup>, Hiroshi Saito<sup>1</sup> and Tomotaka Sobue<sup>6</sup>

<sup>1</sup>Cancer Screening Technology Division, Research Center for Cancer Prevention and Screening, National Cancer Center, Tokyo, <sup>2</sup>Cancer Screening Center, Miyagi Cancer Society, Miyagi, <sup>3</sup>Osaka Cancer Prevention and Detection Center, Osaka, <sup>4</sup>Matsue Red Cross Hospital, Matsue, <sup>5</sup>Department of Public Health, Yamagata University School of Medicine, Yamagata and <sup>6</sup>Cancer Information Services and Cancer Surveillance Division, Center for Cancer Control and Information Services, National Cancer Center, Tokyo, Japan

Received November 13, 2007; accepted February 10, 2008; published online March 14, 2008

**Background:** Gastric cancer is the leading cause of death from cancer in Japan. In 2004, there were 50 562 deaths from gastric cancer; they accounted for 15.8% of the total number of cancer deaths. Since 1983, under the Health Service Law for the Aged, gastric cancer screening has been conducted nationwide for all residents aged 40 years and over.

**Methods:** On the basis of the standardized method developed for the Japanese Guidelines for Cancer Screening, the efficacies of various methods for gastric cancer screening were evaluated and the guideline was developed.

**Results:** Four methods for gastric cancer screening were evaluated: photofluorography, endoscopy, serum pepsinogen testing and *Helicobacter pylori* antibody testing. On the basis of the analytic framework involving key questions, 1715 articles, published from January 1985 to February 2005, were selected using MEDLINE, the Japanese Medical Research Database and other methods. After the systematic literature review, 10 articles were identified as direct evidence and 49 articles as indirect evidence. The studies that evaluated mortality reduction from gastric cancer included five case–control and two cohort studies for radiographic screening. On the basis of the balance of benefits and harms, the recommendations for population-based and opportunistic screening were formulated. Gastric cancer screening using photofluorography was recommended for both screening programs. The other methods were not recommended for population-based screening due to insufficient evidence.

**Conclusions:** The guideline for gastric cancer screening guideline was developed based on the previously established method. Gastric cancer screening using photofluorography is recommended for population-based and opportunistic screening in Japan.

*Key words:* gastric cancer – cancer screening – guideline – recommendation – photofluorography

## INTRODUCTION

Gastric cancer is the leading cause of death from cancer in Japan. However, between 1980 and 2003, the age-adjusted mortality has decreased from 69.9 to 34.5 per 100 000 in males and from 34.1 to 13.2 per 100 000 in females (1). There were 50 562 deaths from gastric cancer in 2004; they accounted for 15.8% of all cancer deaths (2). Gastric cancer is the third cause of death from cancer in males and the second cause of death from cancer in females. Around 1960, gastric cancer screening using photofluorography was started

in Miyagi prefecture, and this approach has been adopted nationwide. In 1983, under the Health Service Law for the Aged, gastric cancer screening was introduced for all residents aged 40 years and over. In 2004, 4.4 million inhabitants participated in gastric cancer screening; the screening rate has been around 13% (3).

In Japan, the research group for cancer screening recommended six cancer screening programs in 2001 (4). Photofluorography was recommended for gastric cancer screening based on the results of several case–control and cohort studies. Although photofluorography screening has been mandated in population-based screening as public policy, other methods including endoscopy, serum pepsinogen testing and *Helicobacter pylori* antibody testing have been used mainly in the clinical setting for opportunistic

For reprints and all correspondence: Chisato Hamashima, Cancer Screening Technology Division, Research Center for Cancer Prevention and Screening, National Cancer Center, 5-1-1 Tsukiji Chuo-ku, Tokyo 104-0045, Japan.  
E-mail: chamashi@ncc.go.jp

screening. However, based on previous reports, the efficacy of these methods remains unclear.

A new research group established a standardized method for developing the Japanese Guidelines for Cancer Screening (5). On the basis of this methodology, we evaluated the efficacy of various methods for gastric cancer screening and developed the new guidelines.

## METHODS

The target audience for the gastric cancer screening guideline includes the public, health professionals working in cancer screening programs, providers of cancer screening programs and policy makers. The gastric cancer screening guideline was developed using the standardized methods (4). The members of the guideline development group for gastric cancer screening (Panel) were selected from various specialties, including gastroenterologists, endoscopists, epidemiologists and researchers involved in public health and the gastric cancer screening program. A systematic literature review was conducted by the members of the review committees for gastric cancer screening, including the Panel members. The recommendations were assessed in conjunction with the board members of the Japanese Research Group for Cancer Screening Guidelines.

### ANALYTIC FRAMEWORK

The target population for gastric cancer screening was defined to be asymptomatic people with an average risk of gastric cancer. Four methods were evaluated: photofluorography, endoscopy, serum pepsinogen testing and *H. pylori* antibody testing. To select appropriate evidence, an analytic framework for gastric cancer screening was developed (Fig. 1). For each stage of the analytic framework, key questions based on the PICO (population, intervention, comparison and outcome) format were prepared. Direct evidence was defined as evidence provided by a study that evaluated the efficacy of cancer screening in reducing gastric cancer mortality (Fig. 1, arrow 1). Other studies that provided indirect evidences were selected based on the key questions related to other stages of the analytic framework (Fig. 1, arrows 2–9). *Helicobacter pylori* antibody screening is not intended to detect gastric cancer directly, but it is done to identify a high-risk group. It is possible to prevent gastric cancer by eradication of *H. pylori*. Thus, another route was prepared to evaluate the efficacy of *H. pylori* antibody screening (Fig. 1, arrows 10–12).

### SYSTEMATIC LITERATURE REVIEW

A search of literature published from January 1985 to February 2005 was performed using MEDLINE, CINAHL and the Japanese Medical Research Database (Igaku-Cyuo-Zasshi). Key journals were searched

manually, including the *Journal of Gastroenterological Cancer Screening* and the *Journal of the Japanese Association for Cancer Detection and Diagnosis*. In addition, the reference lists of the NCI-PDQ (6) and the previous report (4) dealing with the evaluation of gastric cancer screening were checked, and appropriate articles were included. To select appropriate evidence, a systematic review of the retrieved articles was conducted using the standardized method (5).

### TRANSLATION INTO RECOMMENDATIONS

The body of evidences for each screening method was summarized in an evidence table based on the analytic framework's key questions. The benefit of each screening modality was determined based on the level of evidence (5). The evidence is divided into eight levels based on study design and quality. The harms, including the false-negative rate, the false-positive rate and the burden of screening, were compared among the methods. Considering the balance of the benefits and harms, five grades of recommendations were determined for population-based and opportunistic screening (5).

### FORMULATING THE GUIDELINE

After the consultations were completed, three types of guidelines were published and posted on two websites: Promoting Evidence-based Cancer Screening (<http://canscreen.ncc.go.jp/>) and the Research Center for Cancer Prevention and Screening, National Cancer Center (<http://ganjoho.ncc.go.jp/pro/index.html>).

## RESULTS

### SYSTEMATIC LITERATURE REVIEW

On the basis of the literature search using MEDLINE and other databases, 1715 articles published from January 1985 to February 2005 were identified. The abstracts were reviewed, and 149 articles were selected for full text review. After the full text review, 10 articles were identified as providing direct evidence and 49 articles were identified as providing indirect evidence. To facilitate judging the evidence provided by the selected articles, an evidence table for each stage of the analytic framework was created for the screening methods. The numbers of articles selected as providing evidence for each screening method is shown in Table 1.

### LEVEL OF EVIDENCE

#### PHOTOFLUOROGRAPHY (LEVEL OF EVIDENCE: 2++)

No RCT dealing with the use of photofluorography in gastric cancer screening has been published. Five case-control

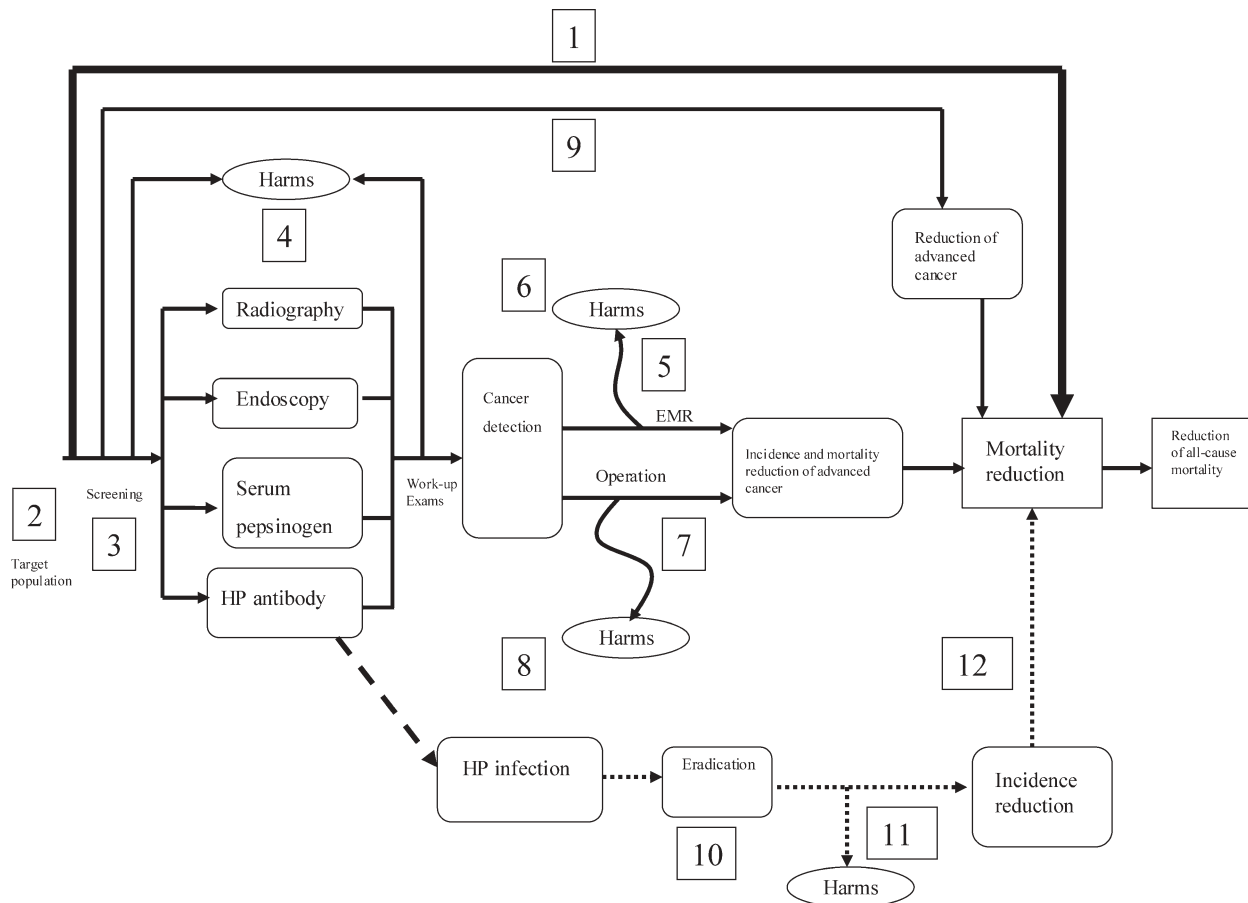

**Figure 1.** Analytic framework and key question. HP, *Helicobacter pylori*.

studies and two cohort studies dealing with photofluorography were identified (Table 2) (7–13). Although as observational studies these studies had limitations, the main potential confounders were identified and taken into account during the evaluation of most the studies. Therefore, these studies were graded as providing a 2++ level of evidence. One of the case–control studies was conducted in

Venezuela, and the others were conducted in Japan. Most of the case–control studies suggested a 40–60% decrease in gastric cancer mortality with photofluorography screening. Tsubono et al. performed a meta-analysis of three case–control studies conducted in Japan. Their results showed that gastric cancer screening using photofluorography resulted in a mortality reduction from gastric cancer (male OR: 0.47,

**Table 1.** Evidence for gastric cancer screening

| Methods                             | Level of evidence | Direct evidence (AF)        |                               | Indirect evidence (AF2-12) |              |                |                     |                           |                            |  |
|-------------------------------------|-------------------|-----------------------------|-------------------------------|----------------------------|--------------|----------------|---------------------|---------------------------|----------------------------|--|
|                                     |                   | All Effective (significant) | Others                        | All Target AF2             | Accuracy AF3 | Harms AF4      | Survival rate AF7.8 | HP eradication AF10.11.12 | Target age/Interval others |  |
| Gastroglurography                   | 2++               | 8 7                         | 1 (effective—not significant) | 24 0                       | 8            | 9              | 4                   | 0                         | 3                          |  |
| Gastroendoscopy                     | 2–                | 1 0                         | 1 (low quality)               | 4 0                        | 3            | 2 <sup>a</sup> | 0                   | 0                         | 0                          |  |
| Serum pepsinogen                    | 2–                | 1 0                         | 1 (low quality)               | 13 0                       | 7            | 9 <sup>b</sup> | 0                   | 0                         | 0                          |  |
| <i>Helicobacter pylori</i> antibody | 2–                | 0 0                         | 0                             | 6 1 <sup>c</sup>           | 1            | 0              | 0                   | 4                         | 0                          |  |

<sup>a</sup>One article provides evidence of test accuracy.

<sup>b</sup>Three articles provide evidence of test accuracy.

<sup>c</sup>One article provides evidence of test accuracy for serum pepsinogen and *Helicobacter pylori* antibody. HP, *Helicobacter pylori*.

**Table 2.** Observational studies dealing with gastric cancer screening

| Author         | Year reported | Study design                   | Study population                 | Age (year) | No of subjects                                                                 | Follow-up | Results                                                                                                     |
|----------------|---------------|--------------------------------|----------------------------------|------------|--------------------------------------------------------------------------------|-----------|-------------------------------------------------------------------------------------------------------------|
| Oshima et al.  | 1986          | Case-control                   | Osaka, Japan                     | 40 +       | Males: 54 cases/156 controls<br>Females: 37 cases/105 controls                 | —         | Odds ratio (95% CI)<br>Males: 0.595 (0.338–1.045) <sup>a</sup><br>Females: 0.382 (0.185–0.785) <sup>a</sup> |
| Pisani et al.  | 1994          | Case-control                   | Tachira, Venezuela               | 35 +       | All: 241 cases/2410 controls                                                   | —         | Odds ratio (95% CI)<br>Males: 1.52 (0.94–2.47)<br>Females: 0.77 (0.33–1.91)                                 |
|                |               |                                |                                  | 35 +       | All: 85 cases/375 controls                                                     | —         | Odds ratio (95% CI)<br>All: 0.47 (0.24–0.98) <sup>b</sup><br>All: 0.25 (0.12–0.51) <sup>c</sup>             |
|                |               |                                |                                  |            |                                                                                |           |                                                                                                             |
| Fukao et al.   | 1995          | Case-control                   | Miyagi, Japan                    | 50 +       | Males: 126 cases/364 controls<br>Females: 72 cases/213 controls                | —         | Odds ratio (95% CI)<br>Males: 0.32 (0.19–0.53)<br>Females: 0.63 (0.34–1.16)                                 |
|                |               |                                |                                  |            |                                                                                |           |                                                                                                             |
| Abe et al.     | 1995          | Case-control                   | Chiba, Japan                     | 30–89      | Males: 527 cases/1552 controls<br>Females: 293 cases/861 controls              | —         | Odds ratio (99% CI)<br>Males: 0.371 (0.242–0.568) <sup>d</sup><br>Females: 0.458 (0.263–0.797) <sup>d</sup> |
|                |               |                                |                                  |            |                                                                                |           |                                                                                                             |
| Tsubono et al. | 1999          | Case-control                   | Miyagi, Japan                    | 40–64      | All: 27 cases/270 controls                                                     | —         | Odds ratio (95% CI)<br>All: 0.20 (0.04–0.96) <sup>e</sup>                                                   |
| Inaba et al.   | 1999          | Cohort                         | Gifu, Japan                      | 35 +       | Screened: male 4934, female 4208<br>Unscreened: male 6536, female 8456         | 40 months | Relative risk (95% CI)<br>Males: 0.72 (0.31–1.66)<br>Females: 1.46 (0.4–4.90)                               |
|                |               |                                |                                  |            |                                                                                |           |                                                                                                             |
| Mizoue et al.  | 2003          | Cohort                         | Japan Collaborative Cohort Study | 40–79      | Screened: male 12 999, female 17 772<br>Unscreened: male 23 156; female 33 385 | 8 years   | Relative risk (95% CI)<br>Males: 0.54 (0.41–0.70)<br>Females: 0.74 (0.51–1.07)                              |
|                |               |                                |                                  |            |                                                                                |           |                                                                                                             |
| Tsubono et al. | 1999          | Meta-analysis (3 Japanese CCS) | Osaka, Miyagi Chiba              | —          | Males: 706 cases/2072 controls<br>Females: 402 cases/1179 controls             | 1 year    | Odds ratio (95% CI)<br>Males: 0.39 (0.29–0.52)<br>Females: 0.50 (0.34–0.71)                                 |
|                |               |                                |                                  |            |                                                                                |           |                                                                                                             |

<sup>a</sup>90% confidence interval.<sup>b</sup>Excluded cases within one month before diagnosis.<sup>c</sup>Excluded cases within six months before diagnosis.<sup>d</sup>99% confidence interval.<sup>e</sup>Observation period was limited within 1 year.

95% CI: 0.29–0.52; female OR: 0.50, 95% CI: 0.34–0.72) (10). One of the cohort studies lacked power and did not show a significant difference for the relative risk of mortality (12). The other cohort study showed a significantly decreased mortality in males (RR: 0.54, 95% CI: 0.41–0.70); the reduction in mortality was not significant in females (RR: 0.74, 95% CI: 0.52–1.04) (13). However, in this study, there was selection bias, since both all-causes and gastric cancer mortalities were reduced.

Sensitivity was estimated based mainly on the data obtained from the cancer registry (Table 3) (14–28). The sensitivity of photofluorography ranged from 60% to 80%, whereas the specificity ranged from 80% to 90%. The survival rate of the screened group was compared with that of a

non-screened group in whom cancer was detected in the clinical setting. The 5-year survival rate was 74–80% for the screened group and 46–56% for the non-screened group (29–32).

#### ENDOSCOPY (LEVEL OF EVIDENCE: 2 – )

Although no published studies have evaluated the efficacy of endoscopic screening in terms of mortality reduction in Japan, one cohort study was conducted in an area with a high incidence of gastric cancer in Linqu County, China (33). From 1989 to 1999, endoscopic screening was conducted for 4394 residents. Both the incidence and mortality of gastric cancer were monitored until 2000. In this period,

**Table 3.** Test accuracy of photofluorography for gastric cancer screening

| Author            | Reported year | Follow-up strategy | Follow-up period (year) | Sensitivity (%) | Specificity (%) | Positive predictive value (%) |
|-------------------|---------------|--------------------|-------------------------|-----------------|-----------------|-------------------------------|
| Murakami et al.   | 1989          | Cancer registry    | 1                       | 88.5            | 92.0            | 1.40                          |
| Sugahara N et al. | 1991          | Cancer registry    | 1                       | 70.4            | 90.1            | 1.60                          |
| Fukao A et al.    | 1992          | Cancer registry    | 1                       | 69.3            | 88.8            | 2.00                          |
| Ishida T et al.   | 1994          | Cancer registry    | 1                       | 84.1            | 81.3            | 0.78                          |
| Ishida T et al.   | 1994          | Cancer registry    | 2                       | 70.1            | 81.3            | 0.90                          |
| Hattori M et al.  | 1998          | Cancer registry    | 1                       | 68.6–72.5       | ?               | ?                             |
| Abe S et al       | 2000          | Cancer registry    | 1                       | 56.8            | 90.7            | 2.00                          |

85 gastric cancers were detected, of which 29 cases were early cancers. However, compared with the overall mortality for Linqu County, the standard mortality ratio was 1.01 (95% CI: 0.32–1.37).

Only two studies related to the use of endoscopy as a diagnostic test reported the accuracy of endoscopy (34,35). In the first study, the sensitivity of endoscopy was found to be 77.8% based on 3-year follow-up using the cancer registry system in Fukui prefecture (34). However, the target population of this study was patients who had symptoms. In addition, the specificity was not reported. In another study based on a follow-up survey of individual participants, Otsuji et al. (35) reported that the sensitivity of endoscopy was 84.0%. No studies that have compared the survival of patients with gastric cancer between screened and non-screened group.

Adverse effects related to endoscopy are reported every 5 years by the Japanese Association of Gastroenterological Endoscopy (36). However, these results are not separately reported and classified by the purpose of endoscopy (screening, diagnostic test and treatment). The details of the adverse effects associated with endoscopic screening are unclear.

#### SERUM PEPSINOGEN TEST (LEVEL OF EVIDENCE: 2 – )

A one-arm cohort study was conducted in a small distinct of Tokyo (37). On the basis of death certificates, three gastric cancer deaths were identified. Compared with gastric cancer deaths nationwide, the relative risk for the screening group was 0.34 (95% CI: 0.07–0.98). However, there are several limitations to this study related to target selection, lack of an appropriate comparator within the same population, lack of previous screening history and the short follow-up period. These issues were not discussed in the published paper.

Several studies reported the sensitivity of serum pepsinogen testing compared with the results of endoscopy done at the same time (38–45). The sensitivity of the serum pepsinogen test ranged from 40% to 80%, but the specificity was below 80%. Several studies reported that, compared with the results of endoscopy, the sensitivity of the serum pepsinogen test was higher than that of radiography. When the accuracy of a new method is compared with that of

photofluorography, it is important to recognize that gastric cancer screening using radiography is popular in Japan, and that most participants have been previously screened by radiography. Although the detection rate of radiographic screening is low because it is being used as an incidence screen, it was the first time that most participants had been screened using serum pepsinogen testing; thus, the serum pepsinogen screen was a prevalence screen. The sojourn time of the serum pepsinogen testing, which is diagnostic test for atrophic gastritis, is probably longer than that of radiography. If one wishes to compare the two methods, they must be analysed under the same conditions.

#### HELICOBACTER PYLORI ANTIBODY (LEVEL OF EVIDENCE: 2 – )

A high-risk group of patients could be identified using a combination of the *H. pylori* antibody and serum pepsinogen tests. Watabe et al. (46) followed 9293 participants who were screened using both *H. pylori* antibody and serum pepsinogen tests for 4.7 years. Compared with gastric cancer cases detected in the group that had a negative serum pepsinogen test and a negative *H. pylori* antibody ( $n = 3324$ ), the hazard ratios were higher in the following groups: the positive serum pepsinogen test and negative *H. pylori* antibody group ( $n = 2134$ ), 1.1 (95% CI 0.4–3.4); the normal serum pepsinogen test and positive *H. pylori* antibody group ( $n = 1082$ ), 6.0 (95% CI 2.4–14.5) and the positive serum pepsinogen test and positive *H. pylori* antibody ( $n = 443$ ), 8.2 (95% CI 3.2–21.5). Yamanoi et al. (43) reported that the sensitivity of *H. pylori* antibody testing was 87.1% and the specificity was 40.8%.

An RCT dealing with the prevention of gastric cancer using *H. pylori* eradication therapy was reported from China (47). The incidence of gastric cancer was similar between participants receiving *H. pylori* eradication therapy and those receiving placebo over a 7.5-year period (hazard ratio 1.10, 95% CI 1.05–1.15).

#### RECOMMENDATIONS

On the basis of the balance of benefits and harms, recommendations were formulated for population-based and opportunistic screening. Benefits were defined as evidence that mortality from a specific cancer was reduced by a cancer screening



program. As well, the harms of various methods were compared (Table 4) (15–28,34–36,38–45,48–57).

Gastric cancer screening using photofluorography was a grade B recommendation for population-based and opportunistic screening (Table 5). The other methods were not recommended as population-based screening due to insufficient evidence. In opportunistic screening, if individuals request screening they should be given appropriate information, and decision-making should be made at the individual level.

## DISCUSSION

A guideline for gastric cancer screening was developed using a standardized method. The details of the guideline development

method have been provided elsewhere, and the differences in the guideline development method have also been described elsewhere. Although the efficacy of gastric cancer screening has been evaluated in previous reports without providing recommendations (4), in our guideline, recommendations have been clearly defined based on the evidences. In the previous guideline, photofluorography was recommended for population-based gastric cancer screening. However, *H. pylori* antibody screening was not recommended, and the evidence for serum pepsinogen testing was insufficient to be able to make a recommendation either for or against its use. In addition, endoscopic screening was not targeted for evaluation.

Over the years, there have been four reports that have made suggestions about gastric cancer screening. In 1990, the UICC report concluded that screening programs should continue in regions with a high incidence of gastric cancer

**Table 4.** Harms of gastric cancer screening

| Harms                                    | Radiography                                                                                                         | Gastroendoscopy                                             | Serum pepsinogen                                                       | <i>Helicobacter pylori</i> antibody          |
|------------------------------------------|---------------------------------------------------------------------------------------------------------------------|-------------------------------------------------------------|------------------------------------------------------------------------|----------------------------------------------|
| False negative rate                      | 20–30%<br>> 10%<br>No                                                                                               | 16%<br>No report<br>No                                      | 16–50%<br>20–30%<br>No (may be affected by nutrition)                  | 17.9%<br>59.2%<br>No                         |
| False positive rate                      | No                                                                                                                  | Anticoagulant                                               | Affected by use of proton pump inhibitor                               | No                                           |
| Nutrition restriction                    | Photofluorography: No                                                                                               | Pharynx anesthetic sedation                                 | No                                                                     | No                                           |
| Adverse effects of premedication         | Direct radiography: possible (antispasmodic agent) shock, blood pressure failure, respiratory failure               | Antispasmodic agent shock, hypotension, respiratory failure | —                                                                      | —                                            |
| Adverse effects of premedication (Death) | Possible                                                                                                            | 0.0001% (14/12,844,551)*                                    | —                                                                      | —                                            |
| Adverse effects of screening test        | False swallowing of barium meal constipation ileus                                                                  | Bleeding, perforation, etc.                                 | —                                                                      | —                                            |
| Frequency of adverse effects             | False swallowing of barium meal 0.08–0.17%<br>Defecation delay: 4–11%                                               | 0.012% (997/826,313)                                        | No                                                                     | No                                           |
| Adverse effects of screening test        | False swallowing of barium meal constipation ileus                                                                  | Bleeding, perforation, etc.                                 | —                                                                      | —                                            |
| Death due to adverse effect              | Cases reported                                                                                                      | 0.00076% (63/826,313)                                       | —                                                                      | —                                            |
| Infection                                | No                                                                                                                  | Possible                                                    | No                                                                     | No                                           |
| Radiation exposure (effective dose)      | Direct radiography<br>Males: 4.9 mSv<br>Females: 3.7 mSv<br>Photofluorography<br>Males: 0.6 mSv<br>Females: 0.6 mSv | No                                                          | No                                                                     | No                                           |
| Others                                   | —                                                                                                                   | —                                                           | May be affected by stomach resection, renal failure and HP eradication | Antibiotic resistance, diarrhoea, soft stool |

\*Included in colonoscopy and laparoscopy.

**Table 5.** Recommendation for gastric cancer screening

| Screening methods                   | Recommendation grade | Recommendations (language) |                                            |
|-------------------------------------|----------------------|----------------------------|--------------------------------------------|
|                                     |                      | Population-based screening | Opportunistic screening                    |
| Gastrogastrography                  | B                    | Recommend                  | Recommend                                  |
| Gastroendoscopy                     | I                    | Not recommend <sup>a</sup> | Decision making at individual <sup>b</sup> |
| Serum pepsinogen                    | I                    | Not recommend <sup>a</sup> | Decision making at individual <sup>b</sup> |
| <i>Helicobacter pylori</i> antibody | I                    | Not recommend <sup>a</sup> | Decision making at individual <sup>b</sup> |

<sup>a</sup>There is insufficient evidence to recommend.

<sup>b</sup>If required, the health professional should explain that the evidence regarding mortality reduction by cancer screening is unclear. In addition, information about the harms is required. In such situations, the decision regarding cancer screening should be made on the individual level.

where they were already under way, but that gastric cancer screening could not be recommended as public health policy in other countries (58). The NCI-PDQ concluded that there was insufficient evidence to suggest that gastric cancer screening, including endoscopy, reduced mortality from gastric cancer (6). The European Code against Cancer (3rd edition) stated that there were no evidences to support gastric cancer screening using radiography, endoscopy or *H. pylori* antibody testing (59). The Medical Screening Association stated that the efficacy of radiographic screening was uncertain (60). The evaluations of endoscopy and *H. pylori* antibody testing reached the same conclusion that we reached. It is possible that serum pepsinogen testing may be effective due to its high test accuracy, as reported by Kitahara et al. (42). In all of the previous reports, no methods were recommended for gastric cancer screening.

The requirements of cancer screening programs differ among countries due to differences in cancer incidence and mortality. In Japan, although the incidence and mortality of gastric cancer have decreased in the last decade, gastric cancer screening is a major issue because the incidence and mortality remain high (1). The screening rate for gastric cancer has flattened, and the effectiveness of gastric cancer screening has been limited. However, endoscopic screening is expected to be an alternative strategy to radiography. No studies have evaluated whether endoscopic screening reduces gastric cancer mortality. Although most people consider that endoscopy has a high detection rate, its sensitivity compared with that of radiography is unclear. To prevent premature death from gastric cancer, evidence-based screening should be promoted. To achieve this aim, it is necessary to determine the mortality reduction that is associated with endoscopic screening. An RCT would be the most preferred strategy, but it would be difficult for gastric cancer screening to be conducted in Japan due to widespread of the screening

programs nationwide. A case-control or cohort studies may be expected as alternative methods for evaluating mortality reduction by endoscopic screening.

After the publication of our guidelines, two cohort studies dealing with radiographic screening were reported (61,62). The results of these studies with respect to the mortality reduction of photofluorography screening are similar. Therefore, we did not need to change our recommendations. In addition, Yoshihara et al. (63) reported the results of a case-control study of serum pepsinogen testing. In this study, although mortality reduction by serum pepsinogen testing was suggested, there were several serious issues that could affect the interpretation of the result. More than half of the cases were over 70 years of age (mean age 71.9 years, ranged up to 92 years). Since the reference date was not clearly defined, the history of exposure to serum pepsinogen testing was not reliable. Therefore, it is difficult to judge the efficacy of serum pepsinogen screening based on this low-quality study. However, both serum pepsinogen testing and *H. pylori* antibody testing are expected to be used to identify individuals at high risk of gastric cancer. A recent study by You et al. (64) reported that *H. pylori* eradication reduced the prevalence of precancerous gastric lesions. Gastric cancer prevention may become possible if the efficacy of *H. pylori* eradication were to be proven. Furthermore, a new screening method involving endoscopy may be expected in the near future. Therefore, we are planning to revise the guideline within 5 years, given that new evidence may become available.

## Acknowledgments

We thank Kanoko Matsushima and Junko Asai for secretarial support.

## Funding

This study was supported by Grant-in-Aid for Cancer Control from Ministry of Health, Labor and Welfare of Japan (Grant number 15-3).

## Conflict of interest statement

None declared.

## References

1. Nomura K, editor. Cancer Statistics in Japan 2005. Tokyo: Foundation for Promotion Cancer Research 2006.
2. Statistics and Information Department, Ministry of Health, Labour, and Welfare. Vital Statistics of Japan 2004. Tokyo: Health and Welfare Statistics Association 2006.
3. Statistics and Information Department, Ministry of Health, Labour, and Welfare. National Reports on Cancer Screening Programs 2004. Tokyo: Health and Welfare Statistics Association 2006.
4. Hisamichi S, editor. Guidelines for Cancer Screening Programs. Tokyo: Japan Public Health Association 2001 (in Japanese).

5. Hamashima C, Saito H, Nakayama T, et al. Standardized development method of Japanese Guidelines for Cancer Screening. *Jpn J Clin Oncol* (submitted for publication).
6. NCI: PDQ (Physician Data Query); gastric cancer screening. <http://www.cancer.gov/cancertopics/pdq/screening/gastric/HealthProfessional/page1> (2005.9.6 access).
7. Oshima A, Hirata N, Ubukata T, Umeda K, Fujimoto I. Evaluation of a mass screening program for stomach cancer with a case-control study design. *Int J Cancer* 1986;38:829–33.
8. Fukao A, Tsubono Y, Tsuji I, Hisamichi S, Sugahara N, Takano A. The evaluation of screening for gastric cancer in Miyagi Prefecture, Japan: a population-based case-control study. *Int J Cancer* 1995;60:45–8.
9. Abe Y, Mitsushima T, Nagatani K, Ikuma H, Minamihara Y. Epidemiological evaluation of the protective effect for dying of stomach cancer by screening programme for stomach cancer with applying a method of case-control study.-A study of a efficient screening programme for stomach cancer. *J Gastroenterol* 1995;92:836–45 (in Japanese).
10. Tsubono Y, Hisamichi S. Case-control studies of screening for gastric cancer in Japan. *J Gastroenterol Mass Surv* 1999;37:182–5 (in Japanese).
11. Pisani P, Oliver WE, Parkin DM, Alvarez N, Vivas J. Case-control study of gastric cancer screening in Venezuela. *Br J Cancer* 1994;69:1102–5.
12. Inaba S, Hirayama H, Nagata C, Kurisu Y, Takatsuka N, Kawakami N, et al. Evaluation of a screening program on reduction of gastric cancer mortality in Japan: preliminary results from a cohort study. *Prev Med* 1999;29:102–6.
13. Mizoue T, Yoshimura T, Tokui N, Hoshiyama Y, Yatsuya H, Sakata K, et al. Prospective study of screening for stomach cancer in Japan. *Int J Cancer* 2003;106:103–7.
14. Yoshida Y, Tamura K, Arisue T, Tebayashi A, Yamaguchi Y, Hiyama S, et al. Precision of routine examination in the gastric carcinoma mass survey. *Stomach and Intestine* 1985;20:943–7 (in Japanese).
15. Yoshida Y, Tamura K. Estimation of false negative case by the ADC method. *J Gastroenterol Mass Surv* 1986;50:6–11 (in Japanese).
16. Sugahara N, Sibuki S, Hirasawa Y, Morimoto T. Characteristics of false negative cases. *Stomach and Intestine* 1991;26:1357–62 (in Japanese).
17. Fukao A, Hisamichi S, Takano A, Sugawara N. Accuracies of mass screening for gastric cancer-Test sensitivity and program sensitivity. *J Gastroenterol Mass Surv* 1992;97:59–63 (in Japanese).
18. Ishida T, Suematsu T, Oomayashi K, Takada Y, Kimura S, Suematsu C. Measurement of accuracy of stomach mass screening by population-based cancer registration. *J Gastroenterol Mass Surv* 1994;32:9–16 (in Japanese).
19. Hattori M, Fujita M, Hosokawa O, Yamazaki S. A clinico-pathological evaluation of false negative cases in gastric cancer mass survey. *J Gastroenterol Mass Surv* 1998;36:468–75 (in Japanese).
20. Abe S, Shibuya D, Noguchi T, Shimada T. An estimate of the false-negative rate of mass-screening for gastric carcinoma. *J Gastroenterol Mass Surv* 2000;38:475–82 (in Japanese).
21. Murakami R, Tsukuma H, Ubukata T, Nakanishi K, Fujimoto I, Kawashima T, et al. Estimation of validity of mass screening program for gastric cancer in Osaka, Japan. *Cancer* 1990;65:1255–60.
22. Tamura K, Hayami H, Suzuki S, Saito H. Sodium picosulfate's effect of constipation induced barium intake for radiographic screening for gastric cancer. *J Gastroenterol Mass Surv* 1985;69:92–101 (in Japanese).
23. Sugawara N, Hirasawa Y, Morimoto T, Sibuki S, Kogane T, Sato H, et al. An investigative report about health state of old age groups at first screening for gastric mass survey. *J Gastroenterol Mass Surv* 1992;95:184–6 (in Japanese).
24. Watanabe Y, Yokoshima T, Sato M, Akihami T, Orii S, Noro A, et al. A case of anaphylactoid reaction occurring after upper gastrointestinal series by barium sulfate compound. *J Iwate Prefectural Hosp Assoc* 1999;39:37–41 (in Japanese).
25. Sano M, Wada N, Katai H, Maeda K, Sakai S, Kou J, et al. Two cases of barium peritonitis after upper gastrointestinal barium radiography-a review of Japanese literature 44 reported cases. *J Abdominal Emerg Med* 1995;15:423–7 (in Japanese).
26. Kato K, Antoku S, Sawada S, Wada T, Russell WJ. Organ doses to atomic bomb survivors during photofluorography, fluoroscopy and computed tomography. *Br J Radiol* 1991;64:728–33.
27. Maruyama T, Iwai K, Nishizawa K, Noda Y, Kumamoto Y. Organ or tissue dose, effective dose and collective effective dose from X-ray diagnosis, in Japan. *Radioisotopes* 1996;45:761–73 (in Japanese).
28. Maruyama T, Iwai K. Exposure dose and effective dose equivalent for gastric cancer screening. Committee of studies on problems from several view points among mass screening programs for cancer. Annual Report 1993 (Primal researcher Hisamichi S) March 1994,74–80 (in Japanese).
29. Ueda H, Mai M, Asai T, Ohta T, Kann T, Ueno M, et al. A clinico-pathological evaluation of detected cancer between screening and no-screening groups. *J Gastroenterol Mass Surv* 1986;71:52–6 (in Japanese).
30. Fujiya T, Komatsu S, Yamanami H, Mikuni J, Kakugawa Y, Kamiyama Y, et al. Treatment of gastric cancer in Miyagi prefecture; Characteristics of gastric cancer detected by mass-screening and current surgical outcome in Miyagi Cancer Center. *Jpn Soc Gastroenterol Surg* 1998;31:2118–22 (in Japanese).
31. Moki F, Imai T, Abe K, Saotome C, Kawamura O, Takagi H, et al. The situation of stomach cancer in Gunma prefecture that we examined on the basis of population-based cancer registry. *J Jpn Assoc Cancer Detect Diag* 2003;10:145–50 (in Japanese).
32. Kampschöer GH, Fujii A, Masuda Y. Gastric cancer detected by mass survey. Comparison between mass survey and outpatient detection. *Scand J Gastroenterol* 1989;24:813–7.
33. Riecken B, Pfeiffer R, Ma JL, Jin ML, Li JY, Liu WD, et al. No impact of repeated endoscopic screens on gastric cancer mortality in a prospectively followed Chinese population at high risk. *Prev Med* 2002;34:22–8.
34. Hosokawa O, Hattori M, Takeda T, Watanabe K, Fujita M. Accuracy of endoscopy in detecting gastric cancer. *J Gastroenterol Mass Surv* 2004;42:33–9 (in Japanese).
35. Otsuji M, Kouno Y, Otsuji A, Tokushige J, Shimotatara K, Arimura K, et al. Assessment of small diameter panendoscopy for diagnosis of gastric cancer: comparative study with follow-up survey date. *Stomach and Intestine* 1989;24:1291–7 (in Japanese).
36. Kaneko E, Harada H, Kasugai T, Kogosi K, Niwa H. Adverse effect survey committee of Association of Gastroenterological endoscopy. The fourth report of adverse effects for gastrointestinal endoscopy from 1998 to 2002. *Gastroenterol Endosc* 2004;46:54–61 (in Japanese).
37. Watase H, Inagaki T, Yoshikawa I, Furihata S, Watanabe Y, Miki K. Five years follow up study of gastric cancer screening using the pepsinogen test method in Adachi city. *J Jpn Assoc Cancer Detect Diagn* 2004;11:77–81 (in Japanese).
38. Dinis-Ribeiro M, Yamaki G, Miki K, Costa-Pereira A, Matsukawa M, Kurihara M. Meta-analysis on the validity of pepsinogen test for gastric carcinoma, dysplasia or chronic atrophic gastritis screening. *J Med Screen* 2004;11:141–7.
39. Shiga T, Nomoto K, Nisizawa M, Yamaki G, Nagahama R. A study of accuracy of serum pepsinogen method in mass screening and a mass screening using serum pepsinogen. *J Gastroenterol Mass Surv* 2000;38:490–5 (in Japanese).
40. Ikuma H, Mitsushima T. Evaluation of the screening of stomach cancer using serum pepsinogen, compared with endoscopic findings as the gold standard. *J Gastroenterol Mass Surv* 1998;36:136–44 (in Japanese).
41. Inoue K, Miyoshi E, Aoki S, Itakura S, Mihara O, Yoshihara M, et al. The evaluation of cut-off levels of serum pepsinogens-comprising with gastric endoscopy on the same time in human dry dock. *J Gastroenterol Mass Surv* 1997;35:495–500 (in Japanese).
42. Kitahara F, Kobayashi K, Sato T, Kojima Y, Araki T, Fujino MA. Accuracy of screening for gastric cancer using serum pepsinogen concentrations. *Gut* 1999;44:693–7.
43. Yamanoi A, Hayashi T, Ishihara A, Torisu R, Fujimoto S, Nakamoto Z, et al. Study of the screening of test on gastric cancer. *J Gastroenterol Mass Surv* 1997;35:485–94 (in Japanese).
44. Hattori Y, Tashiro H, Kawamoto T, Kodama Y. Sensitivity and specificity of mass screening for gastric cancer using the measurement of serum pepsinogens. *Jpn J Cancer Res* 1995;86:1210–5.
45. Goto N, Nishiya T, Sakurai Y. A study of gastric mass survey in the employee using serum pepsinogen test (Second Report). *J Gastroenterol Mass Surv* 2004;42:412–7 (in Japanese).



46. Watabe H, Mitsushima T, Yamaji Y, Okamoto M, Wada R, Kokubo T, et al. Predicting the development of gastric cancer from combining *Helicobacter pylori* antibodies and serum pepsinogen status: a prospective endoscopic cohort study. *Gut* 2005;54:764–8.
47. Wong BCY, Lam SK, Wong WM, Chen JS, Zheng TT, Feng RE, et al. *Helicobacter pylori* eradication to prevent gastric cancer in a high-risk region of China: a randomized controlled trial. *JAMA* 2004;291:187–94.
48. Koyama I, Hoshino K, Kubota H, Nakamura J, Machida T, Arai T, et al. Research report on exposure dose in fluoroscopy system. *Jpn J Radiol Technol* 1997;53:609–20 (in Japanese).
49. Kato H, Isobe T, Takagi S, Ochi S, Anzai T, Okumura K, et al. Assessment of institutional differences in radioactivity levels during abdominal x-rays. *Jpn J Radiol Technol* 1999;55:655–64 (in Japanese).
50. Fraiser AG, Lam WM, Luk YW, Sercombe J, Sawyerr AM, Hudson M, et al. Effect of ranitidine bismuth citrate on postprandial plasma gastrin and pepsinogens. *Gut* 1993;34:338–42.
51. Jansen JB, Klinkenberg Knol EC, Meuwissen SG, De Bruijne JW, Festen HP, Snel P, et al. Effect of long-term treatment with omeprazole on serum gastrin and serum group A and C pepsinogens in patients with reflux esophagitis. *Gastroenterology* 1990;99:621–8.
52. Tokieda M, Kodama K, Ito A, Fujiyama K, Kodama R, Kawasaki H, et al. Serum pepsinogen response to therapy for *Helicobacter Pylori* associated gastro-duodenal disease. *J Gastroenterol* 1995;92:1825–31 (in Japanese).
53. Biemond I, Rieu PN, Jansen JB, Joosten HJ, Lamers CB. Prospective study of the effect of gastrectomy with and without bile reflux on serum pepsinogens. *Digestion* 1989;44:124–30.
54. Murakawa M. Influence of impaired renal function and *Helicobacter pylori* infection on serum pepsinogen concentrations. *Jpn J Nephrol* 1999;41:399–405 (in Japanese).
55. Miwa H, Ohkura R, Murai T, Nagahara A, Yamada T, Ogihara T, et al. Effectiveness of omeprazole-amoxicillin-clarithromycin (OAC) therapy for *Helicobacter pylori* infection in a Japanese population. *Helicobacter* 1998;3:132–8.
56. Asaka M, Sugiyama T, Kato M, Satoh K, Kuwayama H, Fukuda Y, et al. A multicenter, double-blind study on triple therapy with lansoprazole, amoxicillin, clarithromycin for eradication of *Helicobacter pylori* in Japanese peptic ulcer patients. *Helicobacter* 2001;6:254–61.
57. Kato M, Yamaoka Y, Kim JJ, Reddy R, Asaka M, Kashima K, et al. Regional differences in metronidazole resistance and increasing clarithromycin resistance among *Helicobacter pylori* isolates from Japan. *Antimicrob Agents Chemother* 2000;44:2214–6.
58. Miller AB, Chamberlain J, Day NE, Hakama M, Prorok PC. Report on a workshop of the uicc project on evaluation of screening for cancer. *Int J Cancer* 1990;46:761–9.
59. European Code Against Cancer, Third edition. [http://www.cancercode.org/add\\_items.htm](http://www.cancercode.org/add_items.htm) (2005.9.6 access).
60. Association of Medical Screening. Screening brief: radiographic screening for stomach cancer. *J Med Screen* 2000;7:120.
61. Lee KJ, Inoue M, Otani T, Iwasaki M, Sasazuki S, Tsugane S, et al. Gastric cancer screening and subsequent risk of gastric cancer: a large-scale population-based cohort study, with a 13-year follow-up in Japan. *Int J Cancer* 2006;118:2315–21.
62. Miyamoto A, Kuriyama S, Nishino Y, Tsubono Y, Nakaya N, Ohmori K, et al. Lower risk of death from gastric cancer among participants of gastric cancer screening in Japan: a population-based cohort study. *Prev Med* 2007;44:12–9.
63. Yoshihara M, Hiyama T, Yoshida S, Ito M, Tanaka S, et al. Reduction in gastric cancer mortality by screening based on serum pepsinogen concentration: a case-control study. *J Scan Gastroenterol* 2007;42:760–4.
64. You WC, Brown LM, Zhang L, Chang YS, Ma JL, Pan KF, et al. Randomized double-blind factorial trial of three treatments to reduce the prevalence of precancerous gastric lesions. *J Natl Cancer Inst* 2006;98:974–83.

## Appendix:

### REVIEW COMMITTEES FOR GASTRIC CANCER SCREENING

Hamashima C, Saito H, Sano H (National Cancer Center), Tanaka J (Hiroshima University), Shibuya D (Miyagi Cancer Association), Honjyo S (Tochigi Cancer Center), Matsuda K (Fukui Health Management Association), Nishida H (Matsushita Health Management Center), Yamazaki H (Osaka Cancer Screening Center), Inoue K (Matsue Red Cross Hospital) and Sasaki S (St Ruka Hospital).

### PEER REVIEW COMMITTEE FOR THE JAPANESE GASTRIC CANCER SCREENING GUIDELINE

Koizumi M (Saga University), Ishikawa T (Tochigi Cancer Center), Imamura K (Yokohama City Hospital), Suko H (Saiseikai Kumamoto Hospital), Yoshino J (Fujita Medical University), Muto K (Shinsyu University), Kakihara H (Ritsumeikan University), Sato T and Ibukuro C (Yamagata Tuberculosis Prevention Association).

### JAPANESE RESEARCH GROUP FOR DEVELOPMENT OF CANCER SCREENING GUIDELINES

Sobue T (Chief, National Cancer Center), Hamashima C, Saito H (National Cancer Center), Nakayama T (Kyoto University), Fukao A (Yamagata University), Tsuji I, Tsubono Y (Tohoku University), Onuki Y (Iwate Prefecture Central Hospital), Sagawa M (Kanazawa Medical University), Aoki D (Keio University), Nakayama T (Osaka Medical Center for Cancer and Cardiovascular Disease), Watanabe Y (Kyoto Prefecture Medical University), Tanaka J (Hiroshima University), Daisuke Shibuya, Shimada G (Miyagi Cancer Association), Honjyo S (Ohmuta National Hospital), Matsuda K (Fukui Health Management Association), Nishida H (Matsushita Health Management Center), Hideo Yamazaki (Osaka Cancer Screening Center), Kazuhiko Inoue (Matsue Red Cross Hospital) and Sasaki S (St Ruka Hospital).
